# Supplementary material
Source: HighWire-hosted journal article supplement (http://ajnr-stage2.highwire.org/highwire/filestream/58263/field_highwire_adjunct_files/0/17-00153.pdf)
Supplement: 17-00153.pdf [file 17-00153.pdf]

**On-line Table: Diagnostic criteria of MRI and dual-energy CT for detection of cartilage invasion**

|                                                       | Signal Intensity/Density or Enhancement                                                 |                                      |                                         |
|-------------------------------------------------------|-----------------------------------------------------------------------------------------|--------------------------------------|-----------------------------------------|
|                                                       | Ossified Cartilage<br>(Cortical Bone)                                                   | Ossified Cartilage<br>(Fatty Marrow) | Nonossified Cartilage                   |
| Normal cartilage                                      |                                                                                         |                                      |                                         |
| MRI                                                   |                                                                                         |                                      |                                         |
| T1-weighted                                           | Very low                                                                                | High                                 | Low                                     |
| T2-weighted                                           | Very low                                                                                | High                                 | Low                                     |
| Contrast-enhanced T1-weighted                         | No enhancement                                                                          | No enhancement                       | No enhancement                          |
| Dual-energy CT                                        |                                                                                         |                                      |                                         |
| WA image                                              | Very high                                                                               | Low                                  | Intermediate (similar to that of tumor) |
| IO image                                              | Could not be evaluated                                                                  | No enhancement (low)                 | No enhancement (low)                    |
| Positive findings for detecting of cartilage invasion |                                                                                         |                                      |                                         |
| MRI <sup>a</sup>                                      |                                                                                         |                                      |                                         |
| T1-weighted                                           | Similar to that of tumor (low)                                                          |                                      |                                         |
| T2-weighted                                           | Similar to that of tumor (intermediate high)                                            |                                      |                                         |
| Contrast-enhanced T1-weighted                         | Similar enhancement to tumor                                                            |                                      |                                         |
| Dual-energy CT <sup>b</sup>                           |                                                                                         |                                      |                                         |
| WA image                                              | Erosion, lysis, or transmural extralaryngeal spreading through the cartilage            |                                      |                                         |
| IO image                                              | Positive corresponding enhancement in the region of cartilage indicated in the WA image |                                      |                                         |

<sup>a</sup> The cartilage displayed the signal intensity on all the sequences needed for findings positive for cartilage invasion.

<sup>b</sup> Diagnostic readings always began with the WA image. After a lesion was evaluated as positive for cartilage invasion on WA images, the iodine distribution on the IO images was examined to derive a final classification of either positive or negative for cartilage invasion.

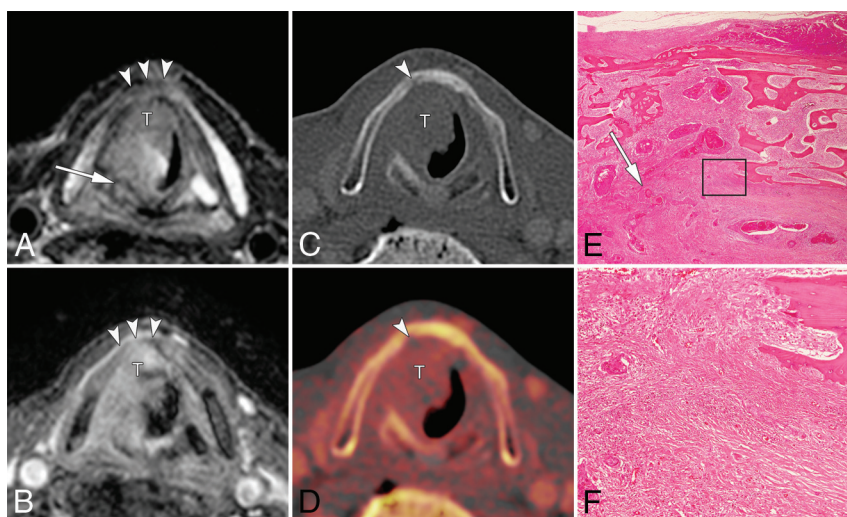

**ON-LINE FIGURE.** Laryngeal cancer in a 67-year-old man with microinvasion of thyroid cartilage and negative invasion of cricoid cartilage. *A*, T2-weighted MR image (glottic level) shows a right-sided laryngeal tumor (T) with intermediate signal intensity. Adjacent anterior thyroid lamina shows an intensity like that of the tumor (*arrowheads*). *B*, Contrast-enhanced fat-suppressed T1-weighted MR image also shows signal intensity like that of the tumor in the thyroid cartilage (*arrowheads*), and MR imaging findings were considered positive for invasion. *C*, Weighted-average image shows focal erosion on the right thyroid cartilage (*arrowhead*). *D*, Iodine overlay image shows no corresponding enhancement in the region indicated on the WA image (*arrowhead*), and dual-energy CT findings were considered negative for invasion. *E*, The tumor cells permeate the ossified right plate of the thyroid cartilage with an extent of 3-mm diameter observed under microscopic examination (*arrow*). *F*, Magnified histopathologic photograph (*square* in *E*) demonstrates lymphocytic infiltration into the medullary space, accompanied by desmoplasia of tumor cells in the thyroid cartilage lamina, which demonstrates extensive enhancement on MR images (hematoxylin-eosin stain; original magnification,  $\times 200$ ). Although MR imaging suggested tumor invasion in the right cricoid cartilage, histopathologic evaluation revealed severe inflammatory change without tumor.
